# Supplementary material
Source: PubMed Central journal article supplement (PMC6417486)
Supplement: TX-008-C8TX00267C-s001.pdf [file TX-008-C8TX00267C-s001.pdf]

## Electronic Supplementary Information

### 1. Supplementary methods:

#### 1.1 Bacterial strains, their maintenance, plant materials and chemicals

Clinical isolates of *P. aeruginosa* (ATCC 27853), *E. coli* (ATCC 25922), *S. aureus* (ATCC 95923) were obtained from culture collection of J.N.M.C.H., Aligarh Muslim University, Aligarh and *Klebsiella pneumoniae* sub sp. pneumoniae (ATCC 700603) was procured from NCCS, Pune, India. Bacterial isolates were sub-cultured in Luria Bertani (LB) broth (HiMedia, India) and Brain Heart Infusion (BHI) broth (HiMedia, India) and maintained on LB and BHI agar slants (1.8 %) at 4°C and were sub-cultured regularly. Leaves of *A. indica* were collected from trees planted in the Faculty of Agricultural Sciences, Aligarh Muslim University, Aligarh, India. Zinc (II) nitrate hexahydrate [ $\text{Zn}(\text{NO}_3)_2 \cdot 6\text{H}_2\text{O}$ ] used for the synthesis of ZnONPs, propidium iodide (PI), acridine orange (AO), and gentamicin discs (5 µg/disc) were purchased from Hi-Media laboratories, Mumbai, India. Triphenyl-2, 3, 5-tetrazolium chloride (TTC) was obtained from BDH Reagents and Chemicals, England. The fluorescent probe 2', 7'-dichlorofluorescein diacetate (DCFH-DA) was purchased from Sigma-Aldrich. Double distilled water (DDW) was used throughout the experiments.

#### 1.2 Surface plasmon resonance (SPR), crystal size and functional group analysis

The dried powder of ZnONPs was dispersed in DDW (0.1% w/v) and the SPR was measured by UV-Vis spectrophotometer (GBC Scientific Equipments Pvt. Ltd., Australia) in the range of 300-700 nm with resolving power of 1 nm. Double distilled water was used as a blank. Crystallinity and average size of ZnONPs was determined by X-ray diffraction (XRD). The crystalline size of the ZnONPs was calculated following the Debye–Scherrer's equation:  $D = 0.9\lambda/\beta\cos\theta$ , Where, D is the crystal size of ZnONPs,  $\lambda$  is the wavelength of X-ray source used (1.541 Å), and  $\beta$  is the full-width-at-half maximum of the diffraction peak. The Fourier Transform Infra-Red (FTIR) spectroscopy was used to detect the functional groups of leaf extract involved in the reduction and capping of ZnONPs. Briefly, the air dried powder of *A. indica* foliage and ZnONPs were diluted with spectroscopic grade KBr (mass ratio of about 1:100) and the spectra were recorded in attenuated total reflectance (ATR) mode. FTIR measurements were carried out on Perkin Elmer FT-IR spectrometer Spectrum Two (Perkin Elmer Life and Analytical Sciences, CT,

USA) in the diffuse reflectance mode at a resolution of  $4\text{ cm}^{-1}$  in KBr pellets in the range of 400 to  $4,000\text{ cm}^{-1}$ .

### **1.3 Surface morphology, shape, primary and secondary size of ZnONPs**

The scanning electron microscopy (SEM) was used to determine the morphology of ZnONPs. For this, thin films of ZnONPs powder were prepared on a carbon coated copper grid in JEOL JSM-6510 SEM (JEOL, Tokyo, Japan) and visualized at an accelerating voltage of 15 kV. The Transmission Electron Microscopy (TEM) was employed to determine size and shape of ZnONPs using JEOL-2100 (JEOL, Tokyo, Japan) with an accelerating voltage of 200 kV. Samples for microscopy were prepared by dropping  $10\text{ }\mu\text{l}$  of ZnONPs sample on a copper grid. Excess solution was removed by using a piece of soft filter paper. The copper grid was then dried for 6 h in an oven at  $80^{\circ}\text{C}$  and visualized under TEM. Dynamic light scattering (DLS) was performed on a ZetaSizer Nano-ZS90, Malvern, UK to determine the hydrodynamic sizes of the ZnONPs in aqueous suspension. The  $\zeta$ -potential values of the NPs were determined and the values presented are the average of five readings.

### **Supplementary figures:**

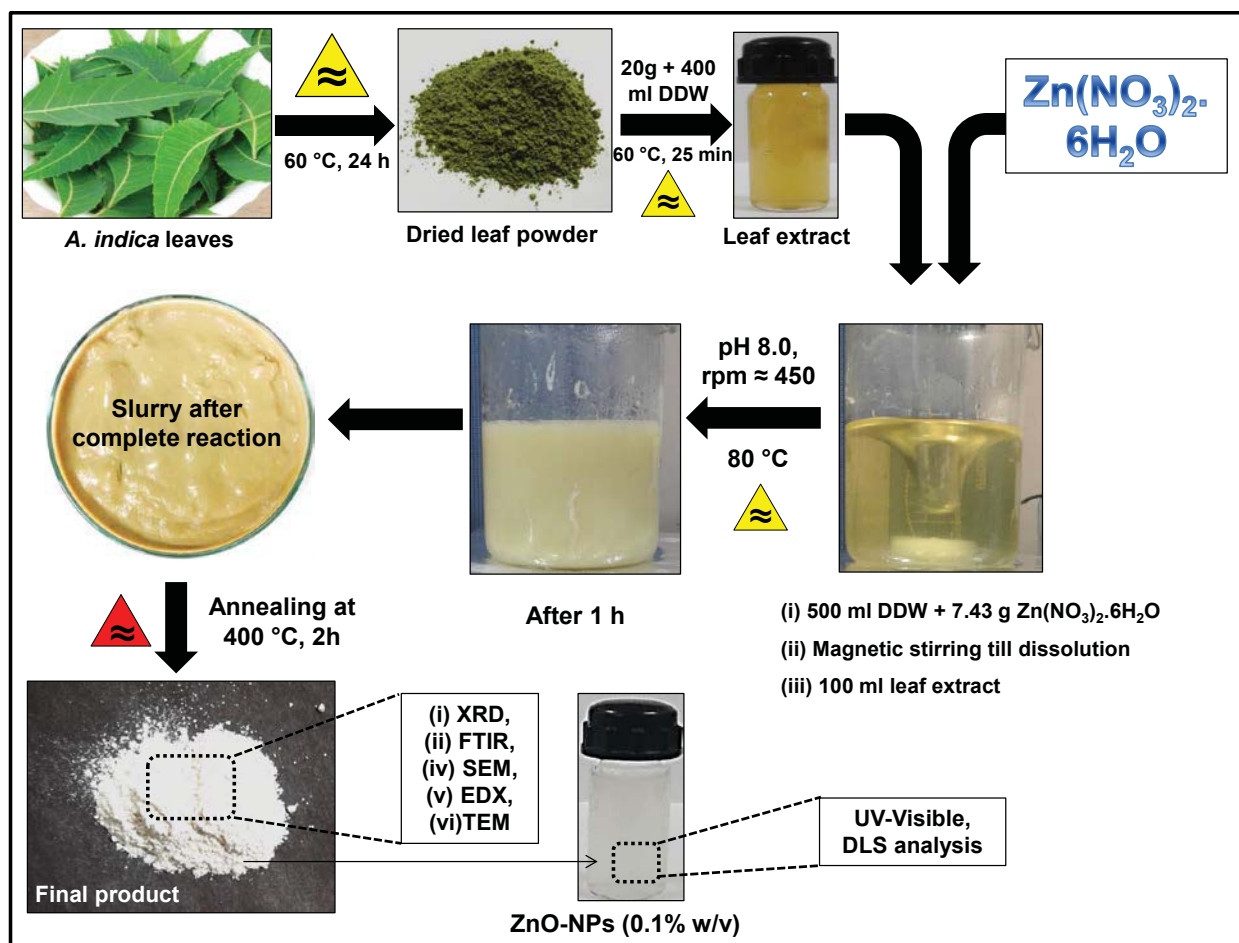

**Supplementary Fig. 1** Flow chart for experimental procedure of green production of ZnONPs using *A. indica* leaf extract.

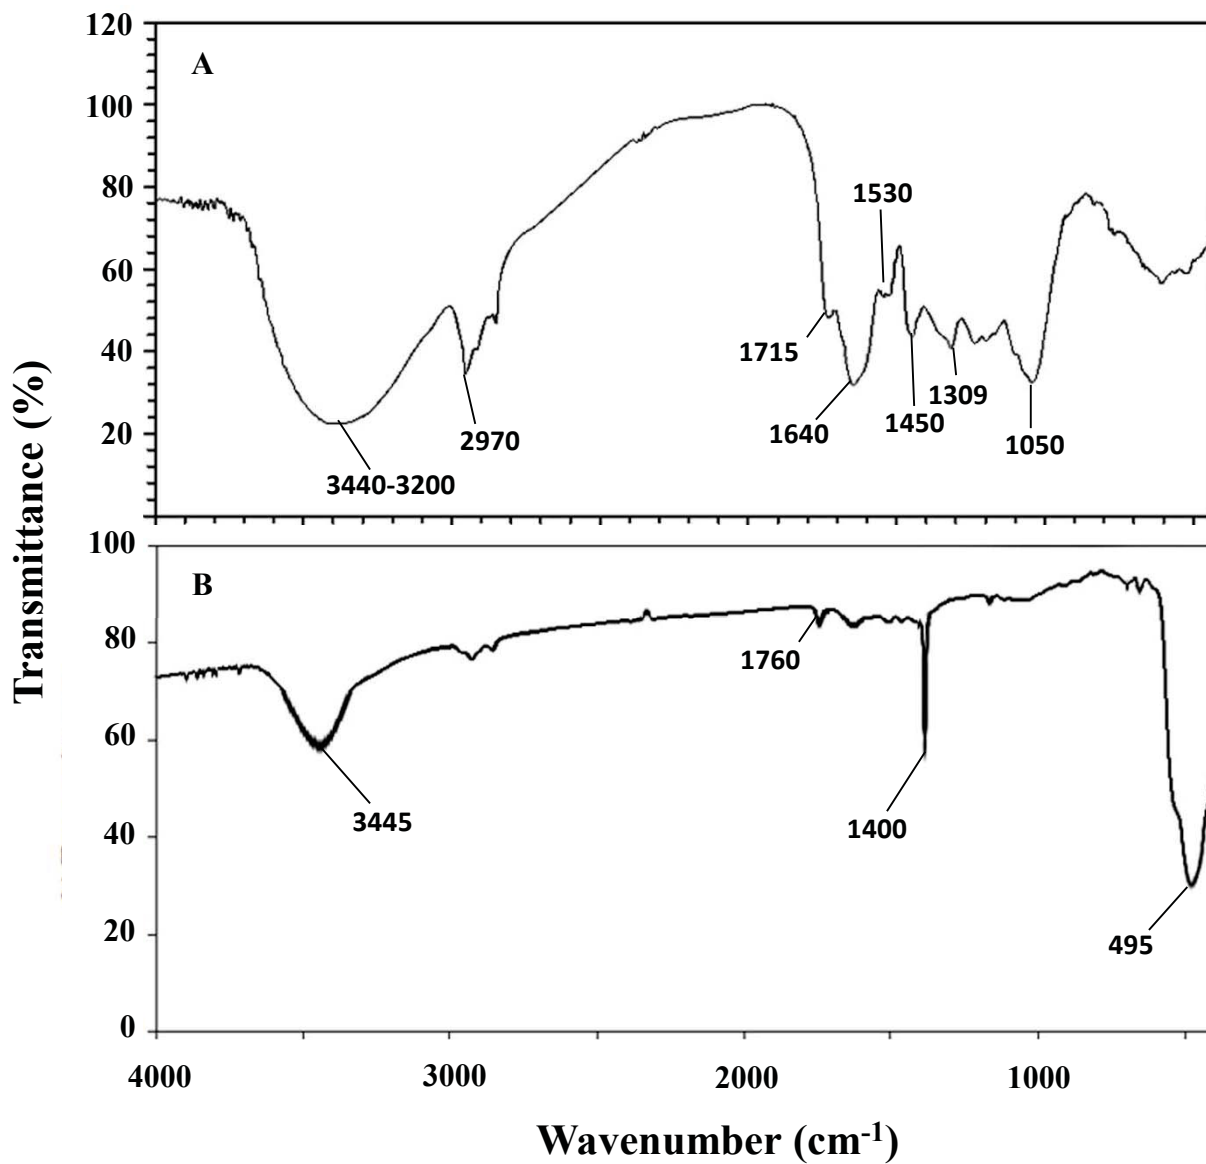

**Supplementary Fig. 2** FTIR spectra of *A. indica* leaves (panel A) and green synthesized ZnO-NPs (panel B).

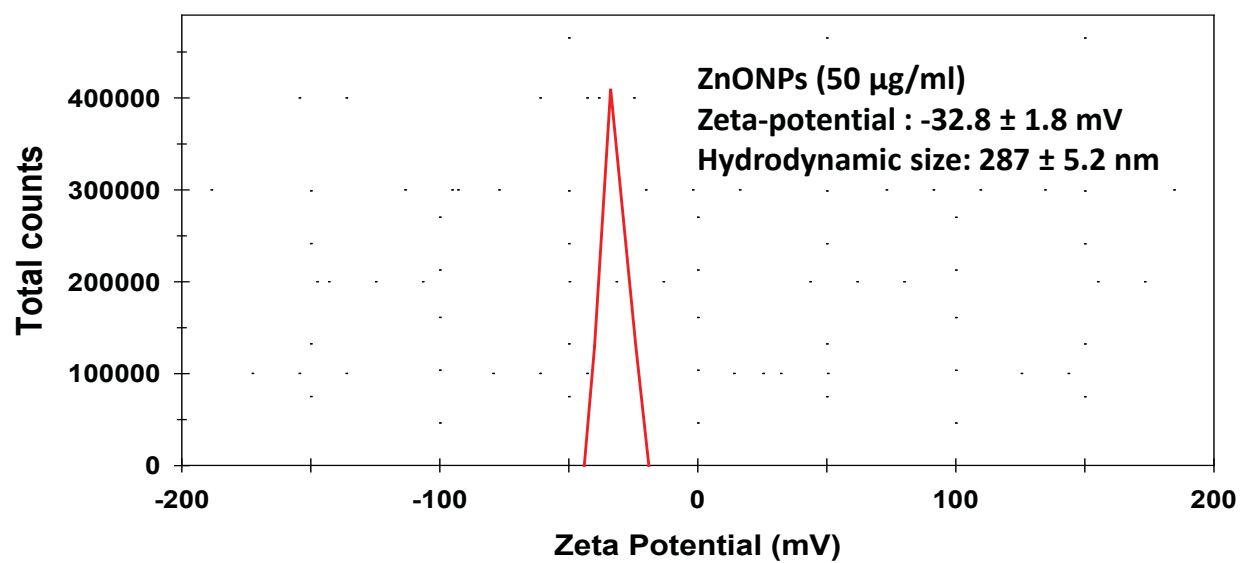

**Supplementary Fig. 3** Measurement of secondary size parameters of ZnONPs:  $\zeta$ -potential analysis and hydrodynamic size of ZnONPs suspended in double distilled water (ddw).

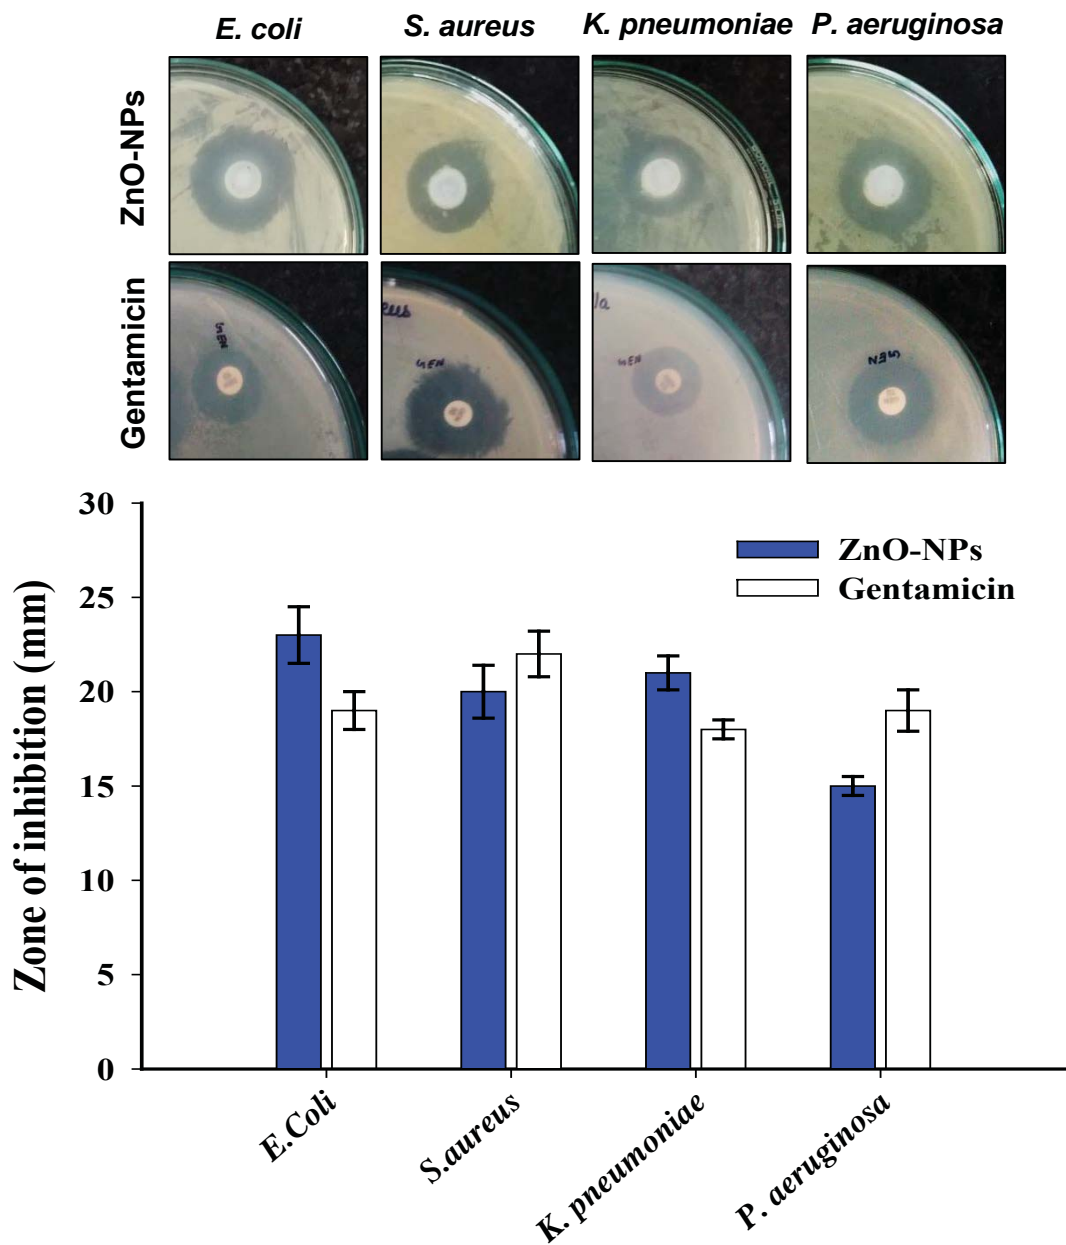

**Supplementary Fig. 4** Determination of antibacterial potential of ZnO-NPs against *E. coli*, *S. aureus*, *K. pneumoniae*, and *P. aeruginosa*. Gentamicin disc (5  $\mu$ g/disc) was used as positive control. Bars represent the values of inhibition zone as mean $\pm$ S.D.

**Supplementary table 1:** Functional group assignment of IR signals detected in *A.indica* leaf extract and ZnO-NPs.

| <b>Vibration</b>                             | <b>IR signal<br/>in <i>A. indica</i> leaf</b> | <b>IR signal<br/>in ZnO-NPs</b> | <b>Reference</b>       |
|----------------------------------------------|-----------------------------------------------|---------------------------------|------------------------|
| -OH stretch                                  | 3200-3440                                     | 3445                            | Bagad and Khan. (2015) |
| C-H stretch of aliphatic hydrocarbons        | 2970                                          | -                               | Ali et al. (2015)      |
| >C=O groups of aliphatic acids               | 1715                                          | 1760                            | Ali et al. (2015)      |
| C=C aromatic ring stretch                    | 1640                                          | -                               | Wang et al. (2014)     |
| N-H bending of amide-II                      | 1530                                          | -                               | Ramos et al. (2016)    |
| C-H bending of alkanes                       | 1450                                          | 1400                            | Balaji et al. (2017)   |
| Amide-III in proteins                        | 1309                                          | -                               | Lu and Rasco (2012)    |
| C-N stretching vibration of aliphatic amines | 1050                                          | -                               | Wang et al. (2014)     |
| Vibration of ZnO-NPs                         | -                                             | 495                             | Current study          |
